# Supplementary material
Source: PubMed Central journal article supplement (PMC4793822)
Supplement: zhac017643.ww1_default.pdf [file zhac017643.ww1_default.pdf]

**Appendix 1:** Flow-chart of study participants [posted as supplied by authors]

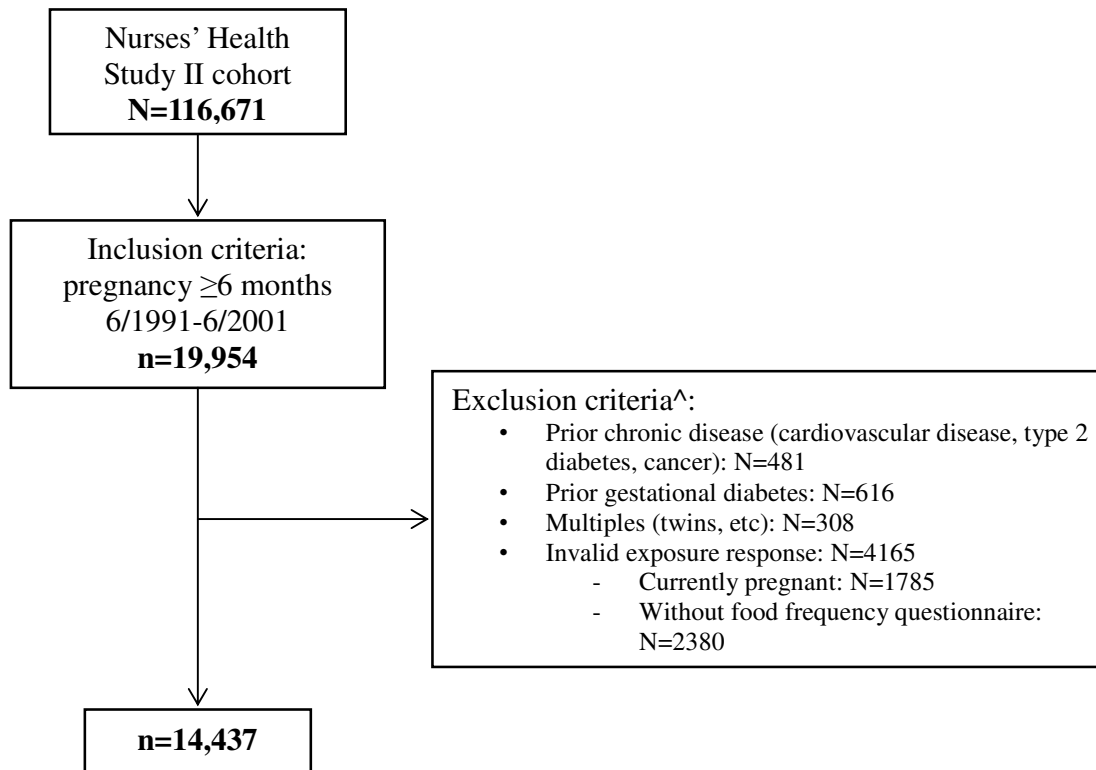

<sup>^</sup>Exclusion criteria are not mutually exclusive and individual reasons may not total the number of excluded participants.
