# Supplementary material
Source: PubMed Central journal article supplement (PMC4793822)
Supplement: zhac017643.ww2_default.pdf [file zhac017643.ww2_default.pdf]

**Appendix 2.** Low-risk lifestyle factors and population attributable risk percentage of gestational diabetes according to prevalence of risk factors among women ages 18-45 years old in the US National Health and Nutrition Examination Survey (2007-2010) data [posted as supplied by authors]

| <b>Low-risk factors</b>                                                                                                                                                                                  | <b>Percent of US women<sup>†</sup><br/>in low-risk group</b> | <b>Population attributable risk<br/>percentage (95% confidence<br/>interval)<sup>‡</sup></b> |
|----------------------------------------------------------------------------------------------------------------------------------------------------------------------------------------------------------|--------------------------------------------------------------|----------------------------------------------------------------------------------------------|
| Current non-smoker                                                                                                                                                                                       | 79.0                                                         | 6.1 (2.3 to 10.2)                                                                            |
| body mass index < 25 kg/m <sup>2</sup>                                                                                                                                                                   | 40.5                                                         | 33.0 (27.8 to 39.3)                                                                          |
| Alternate Healthy Eating Index-2010 diet score in upper 2 quintiles                                                                                                                                      | 40.1                                                         | 11.4 (3.4 to 19.1)                                                                           |
| Moderate/vigorous exercise ≥ 150 minutes/week                                                                                                                                                            | 27.5                                                         | 10.9 (6.8 to 20.6)                                                                           |
| 3 factors in low-risk category (current non-smoker, moderate/vigorous physical activity ≥ 150 min/week, Alternate Healthy Eating Index-2010 diet score in upper 2 quintiles)                             | 9.1                                                          | 37.3 (25.8 to 48.3)                                                                          |
| All 4 factors in low-risk category (current non-smoker, body mass index < 25.0, moderate/vigorous physical activity ≥ 150 min/week, Alternate Healthy Eating Index-2010 diet score in upper 2 quintiles) | 5.4                                                          | 49.2 (36.2 to 60.0)                                                                          |

<sup>†</sup> Distribution of low-risk factors based on National Health and Nutrition Examination Survey (2007-2010).
